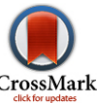

## Correction

# Correction: Stimulus Discrimination in Cerebellar Purkinje Neurons

The *PLOS ONE* Staff

## Notice of Republication

This article was republished on April 21, 2014 to replace an incorrectly published version where an equation in the Materials and Methods section was omitted in the PDF and XML during the typesetting process. Please download this article again to view the correct version. The originally published, uncorrected article and the republished, corrected article are provided here for reference.

## Supporting Information

**File S1.** Originally published, uncorrected article.

**File S2.** Republished corrected article.

## Reference

1. Reusch K, Russell NA, Bellamy TC (2014) Stimulus Discrimination in Cerebellar Purkinje Neurons. *PLOS ONE* 9(2): e87828. doi:10.1371/journal.pone.0087828

**Citation:** The *PLOS ONE* Staff (2014) Correction: Stimulus Discrimination in Cerebellar Purkinje Neurons. *PLOS ONE* 9(6): e101376. doi:10.1371/journal.pone.0101376

**Published:** June 20, 2014

**Copyright:** © 2014 The *PLOS ONE* Staff. This is an open-access article distributed under the terms of the Creative Commons Attribution License, which permits unrestricted use, distribution, and reproduction in any medium, provided the original author and source are credited.
